# Supplementary material for: Brucella abortus Strain RB51 Administered to Prepubescent Water Buffaloes, from Vaccination to Lactation: Kinetics of Antibody Response and Vaccine Safety
Source: MDPI journal article supplement (doi:10.3390/microorganisms11082078), 2023-08-13
Supplement: s1 [file s1]

**Table S1.** Non-parametric Mann Whitney test for RB51-CFT antibody titers. Comparison of logarithmic values of RB51-CFT between vaccinated and control animals for each time point. (*p* value, red cells *p* < 0.05).

| Weeks post vaccination | mean_Controls | Mean_Vaccinated | U   | <i>p</i> -value |
|------------------------|---------------|-----------------|-----|-----------------|
| 0                      | 0             | 0               | 90  | #N/D            |
| 1                      | 0             | 18.631          | 177 | 0               |
| 2                      | 0             | 22.849          | 174 | 0               |
| 3                      | 0             | 31.396          | 171 | 0.001           |
| 4                      | 0.471         | 20.162          | 169 | 0.001           |
| 5                      | 0             | 20.763          | 168 | 0.001           |
| 6                      | 0             | 17.999          | 174 | 0               |
| 7                      | 0             | 12.089          | 159 | 0.003           |
| 8                      | 0             | 13.099          | 168 | 0.001           |
| 10                     | 0             | 9.078           | 159 | 0.003           |
| 11                     | 0             | 5.714           | 144 | 0.015           |
| 12                     | 0             | 4.602           | 153 | 0.005           |
| 13                     | 0             | 5.644           | 153 | 0.006           |
| 14                     | 0             | 4.801           | 150 | 0.008           |
| 15                     | 0             | 4.673           | 150 | 0.008           |
| 16                     | 0             | 3.164           | 129 | 0.056           |
| 17                     | 0             | 1.998           | 126 | 0.072           |
| 18                     | 0             | 2.490           | 132 | 0.045           |
| 19                     | 0             | 1.635           | 123 | 0.091           |
| 20                     | 0             | 2.102           | 132 | 0.045           |
| 21                     | 0             | 16.975          | 180 | 0               |
| 22                     | 0             | 18.815          | 180 | 0               |
| 23                     | 0             | 32.126          | 180 | 0               |
| 24                     | 0             | 25.412          | 174 | 0               |
| 25                     | 0             | 25.484          | 174 | 0               |

|    |   |        |        |       |
|----|---|--------|--------|-------|
| 26 | 0 | 24.580 | 174    | 0     |
| 27 | 0 | 21.535 | 171    | 0     |
| 28 | 0 | 23.429 | 168    | 0     |
| 29 | 0 | 16.876 | 168    | 0     |
| 30 | 0 | 16.074 | 168    | 0     |
| 31 | 0 | 14.059 | 168    | 0     |
| 32 | 0 | 13.150 | 165    | 0     |
| 33 | 0 | 11.386 | 168    | 0     |
| 34 | 0 | 13.843 | 168    | 0     |
| 35 | 0 | 12.452 | 168    | 0     |
| 36 | 0 | 11.201 | 168    | 0     |
| 37 | 0 | 13.952 | 140    | 0     |
| 40 | 0 | 8.054  | 137.5  | 0.001 |
| 41 | 0 | 5.251  | 120    | 0.01  |
| 42 | 0 | 6.774  | 132.5  | 0.002 |
| 43 | 0 | 8.318  | 130    | 0.002 |
| 44 | 0 | 6.619  | 132.5  | 0.002 |
| 45 | 0 | 6.753  | 132.,5 | 0.001 |
| 46 | 0 | 6.854  | 130    | 0.002 |
| 48 | 0 | 4.862  | 120    | 0.01  |
| 50 | 0 | 5.853  | 130    | 0.002 |
| 52 | 0 | 6.243  | 132.5  | 0.002 |
| 54 | 0 | 4.782  | 130    | 0.002 |
| 56 | 0 | 4.844  | 130    | 0.002 |
| 59 | 0 | 1.532  | 80     | 0.324 |
| 61 | 0 | 3.603  | 115    | 0.011 |
| 63 | 0 | 6.408  | 127.5  | 0.002 |
| 67 | 0 | 5.312  | 127.5  | 0.002 |
| 71 | 0 | 2.837  | 112.5  | 0.015 |
| 75 | 0 | 1.654  | 92.5   | 0.121 |
| 80 | 0 | 1.774  | 87.5   | 0.183 |

|     |   |       |       |       |
|-----|---|-------|-------|-------|
| 84  | 0 | 2.493 | 102.5 | 0.048 |
| 93  | 0 | 1.168 | 80    | 0.324 |
| 97  | 0 | 1.631 | 95    | 0.097 |
| 101 | 0 | 1.356 | 87.5  | 0.183 |
| 105 | 0 | 1.509 | 90    | 0.15  |
| 109 | 0 | 0.973 | 90    | 0.149 |
